# Supplementary material for: Towards an understanding of oleate hydratases and their application in industrial processes
Source: PubMed Central journal article supplement (PMC8994360; doi:10.1186/s12934-022-01777-6), 2022-04-09
Supplement: 12934_2022_1777_MOESM1_ESM.pdf [file 12934_2022_1777_MOESM1_ESM.pdf]

## **Additional file 1:**

### **Towards an understanding of oleate hydratase and their application in industrial processes**

Sophia Prem<sup>1</sup>, Carl P. O. Helmer<sup>2</sup>, Nicole Dimos<sup>2</sup>, Stephanie Himpich<sup>2</sup>, Thomas Brück<sup>1</sup>, Daniel Garbe<sup>1,\*</sup>, and Bernhard Loll<sup>2,\*</sup>

<sup>1</sup>Werner Siemens-Chair of Synthetic Biotechnology, Dept. of Chemistry, Technical University of Munich (TUM), Lichtenbergstr. 4, 85748 Garching, Germany

<sup>2</sup>Institut für Chemie und Biochemie, Strukturbiochemie, Freie Universität Berlin, Takustr. 6, 14195 Berlin, Germany

\* To whom correspondence should be addressed:

Email: [daniel.garbe@tum.de](mailto:daniel.garbe@tum.de)

Email: [lolll@chemie.fu-berlin.de](mailto:lolll@chemie.fu-berlin.de)

**Table S1** Overview of available structures of Ohys with cofactor or ligand decoration. Assignment to the respective family of oleate hydratases is given according to Schmidt *et al.* [1]. The PEG molecule originates from the crystallization condition. In the structure of OhySa [2], there are three copies in the asymmetric unit, that are described with differently bound substrates or products.

| Protein      | Organism                                  | HFam Family | Resolution | Cofactor/<br>Ligand   | PDB-ID | Reference |
|--------------|-------------------------------------------|-------------|------------|-----------------------|--------|-----------|
| OhyLa        | <i>L. acidophilus</i>                     | HFam2       | 2.22 Å     | none                  | 4IA5   | [3]       |
| OhyLa        | <i>L. acidophilus</i>                     | HFam2       | 1.80 Å     | linoleic acid         | 4IA6   | [3]       |
| OhySa        | <i>S. aureus</i>                          | HFam2       | 1.84 Å     | PEG                   | 7KAV   | [2]       |
| OhySa        | <i>S. aureus</i>                          | HFam2       | 2.10 Å     | FAD / PEG             | 7KAW   | [2]       |
| OhySa (E82A) | <i>S. aureus</i>                          | HFam2       | 3.51 Å     | none                  | 7KAX   | [2]       |
| OhySa (E82A) | <i>S. aureus</i>                          | HFam2       | 1.95 Å     | oleate                | 7KAY   | [2]       |
| OhySa (E82A) | <i>S. aureus</i>                          | HFam2       | 1.85 Å     | FAD / oleate / 10-HSA | 7KAZ   | [2]       |
| OhyRe        | <i>R. erythropolis</i>                    | HFam3       | 2.64 Å     | none                  | 5ODO   | [4]       |
| OhySt        | <i>Stenotrophomonas</i><br>sp. KCTC 12332 | HFam11      | 2.91 Å     | none                  | 5Z70   | [5]       |
| OhyEm        | <i>E. meningoseptica</i>                  | HFam11      | 2.75 Å     | FAD / PEG             | 4UIR   | [3]       |

**Table S2** Pairwise amino acid sequence comparison. Given are identities and in parenthesis the homology. Pairwise alignments were performed with EMBOSS [6].

|       | OhyLa     | OhySa     | OhyRe     | OhySt     |
|-------|-----------|-----------|-----------|-----------|
| OhyLa | -         | -         | -         | -         |
| OhySa | 61% (76%) | -         | -         | -         |
| OhyRe | 33% (48%) | 33% (48%) | -         | -         |
| OhySt | 37% (55%) | 35% (50%) | 27% (42%) | -         |
| OhyEm | 39% (56%) | 41% (56%) | 28% (44%) | 56% (72%) |

**Table S3** Results of a DALI search [7] for Ohys with the OhySa [2] as reference structure.

| PDB-ID | rmsd [Å] | sequence identity [%] | Z-score | Organism                                  | HFam Family | Cofactor/ Ligand | Reference |
|--------|----------|-----------------------|---------|-------------------------------------------|-------------|------------------|-----------|
| 7KAZ   | 0.0      | 100                   | 66.7    | <i>S. aureus</i>                          | HFam2       | FAD / oleate     | [2]       |
| 7KAY   | 0.6      | 100                   | 58.2    | <i>S. aureus</i>                          | HFam2       | oleate           | [2]       |
| 4IA6   | 1.1      | 61                    | 58.0    | <i>L. acidophilus</i>                     | HFam2       | linoleic acid    | [3]       |
| 4UIR   | 2.1      | 44                    | 48.8    | <i>E. meningoseptica</i>                  | HFam11      | FAD / PEG        | [8]       |
| 5ODO   | 1.7      | 36                    | 34.4    | <i>R. erythropolis</i>                    | HFam3       | none             | [4]       |
| 5Z70   | 1.9      | 42                    | 34.1    | <i>Stenotrophomonas</i><br>sp. KCTC 12332 | HFam11      | none             | [3]       |

## References

1. Schmid J, Steiner L, Fademrecht S, Pleiss J, Otte KB, Hauer B: Biocatalytic study of novel oleate hydratases. *Journal of Molecular Catalysis B: Enzymatic* 2017.
2. Radka CD, Batte JL, Frank MW, Young BM, Rock CO: Structure and mechanism of *Staphylococcus aureus* oleate hydratase (OhyA). *J Biol Chem* 2021, 296:100252.
3. Volkov A, Khoshnevis S, Neumann P, Herrfurth C, Wohlwend D, Ficner R, Feussner I: Crystal structure analysis of a fatty acid double-bond hydratase from *Lactobacillus acidophilus*. *Acta Crystallogr D Biol Crystallogr* 2013, 69:648-657.
4. Lorenzen J, Driller R, Waldow A, Qoura F, Loll B, Brück T: *Rhodococcus erythropolis* Oleate Hydratase: a New Member in the Oleate Hydratase Family Tree-Biochemical and Structural Studies. *ChemCatChem* 2018, 10:407-414.
5. Park AK, Lee GH, Kim DW, Jang EH, Kwon HT, Chi YM: Crystal structure of oleate hydratase from *Stenotrophomonas* sp. KCTC 12332 reveals conformational plasticity surrounding the FAD binding site. *Biochem Biophys Res Commun* 2018, 499:772-776.
6. Rice P, Longden I, Bleasby A: EMBOSS: the European Molecular Biology Open Software Suite. *Trends Genet* 2000, 16:276-277.
7. Holm L, Rosenstrom P: Dali server: conservation mapping in 3D. *Nucleic acids research* 2010, 38:W545-549.
8. Engleder M, Pavkov-Keller T, Emmerstorfer A, Hromic A, Schrempf S, Steinkellner G, Wriessnegger T, Leitner E, Strohmeier GA, Kaluzna I, et al: Structure-Based Mechanism of Oleate Hydratase from *Elizabethkingia meningoseptica*. *Chembiochem* 2015, 16:1730-1734.
